# Supplementary material for: Double‐stranded RNA targeting fungal ergosterol biosynthesis pathway controls Botrytis cinerea and postharvest grey mould
Source: PubMed Central journal article supplement — Plant Biotechnol J. 2021 Nov 18;20(1):226–37. doi: 10.1111/pbi.13708 (PMC8710829; doi:10.1111/pbi.13708), 2021-11-18
Supplement: PBI-20-226-s001.pdf [file PBI-20-226-s001.pdf]

## Supplemental

### **Double-stranded RNA targeting ergosterol biosynthesis pathway control *Botrytis cinerea* and postharvest gray mold**

Danielle Duanis-Assaf<sup>1,2\*</sup>, Ortal Galsurker<sup>1\*</sup>, Olga Davydov<sup>3</sup>, Dalia Maurer<sup>1</sup>, Oleg Feygenberg<sup>1</sup>, Moshe Sagi<sup>4</sup>, Elena Poverenov<sup>5</sup>, Robert Fluhr<sup>3</sup>, Noam Alkan<sup>1#</sup>

<sup>1</sup>Department of Postharvest Science of Fresh Produce, Agricultural Research Organization (ARO), Volcani Institute, Rishon LeZion 7505101, Israel; <sup>2</sup>Robert H. Smith Faculty of Agriculture, Food and Environment, The Hebrew University of Jerusalem, Rehovot, 76100, Israel<sup>3</sup>Department of Plant and Environmental Sciences, Weizmann Institute of Science, Rehovot 7610001, Israel; <sup>4</sup> French Associates Institute for Agricultural and Biotechnology of Drylands, Blaustein Institutes for Desert Research, Sede Boqer Campus, Ben-Gurion University of the Negev, P.O. Box 653, Beer Sheva 84105, Israel; <sup>5</sup>Department of Food Science, Agricultural Research Organization (ARO), Volcani Institute, Rishon LeZion 7505101, Israel.

\*Equally contributed authors.

#Corresponding author: Noam Alkan, noamal@volcani.agri.gov.il; 972-3-9683605

**Short title:** Control of *Botrytis* by dsRNA

**Keywords:** Double-strand RNA; ergosterol biosynthesis; *Botrytis cinerea*; gray mold; postharvest.

## Methods S1

### ERG construct

ERG construct combined sequences of 3 chosen essential genes from the ergosterol biosynthesis pathways (ERG13, ERG11=CYP51, and ERG1) in *Botrytis cinerea* B05.10, a total of 751bp

GAATTC - EcoRI restriction site

TAATACGACTCACTATAGGGAGA - T7 promoter sequence(sense)

#### ERG11=CYP51-307bp

CTGTTTTGACAACCCCGTATTTGGCAAAGATGTAGTTTACGACTGCCCAAATGCGAAGTTGATGGA  
GCAAAAGAAGTTCATGAAAATTGGCTTGCTACAGAAGCTTCCGATCCTACGTCCCAATCATACAAA  
TGGAGGTGGAAAACCTTATGAAGCGTTCCTCGGCGTTCAAAGGTCCAAAGGGAAGTCTGACATTG  
GTCCCGCTATGGCTGAAATCACCATCTACACTGCTTCGCACACTCTGCAAGGAAAGGAAGTCCGCGA  
TCGATTCGATACCTCCTTGCCTCTCTCTACCACGACCT

#### ERG1-210bp

AGAAGCAGATTGTTATTTGGCCATCTCACCATCATCGCAGATGGATATGCCTCCAAATTCCGCAAGC  
AATACATCAACAAAACCTCCATTGTCAAAAGTAAATTCTACGCTCTAGAATTAATAGATTGTCCCATG  
CCAGTCCCAATCATGGAATCGTAGTCCTCTCGGACGTCTCCCCAGTTCTCCTCTATCAAATCGGTACC  
CACGA

#### ERG13-234bp

ATGCTACGGTGGTACCAACGCCGTTTTCAACGCTGTCAACTGGGTAGAATCATCTGCATGGGATGGA  
AGAGACGCCATTGTCGTTGCTGGAGATATTGCTCTATATGCCAAGGGTGCTGCACGTCCAACTGGAG  
GTGCTGGAGCTGTTGCCATGTTGATTGGACCAAATGCTCCAGTTGTTGTCGAGCCTGGTCTTCGCGG  
ATCCTACATGCAACATGCCTACGATTTCTACAA

### Dicer construct

The DCL1/DCL2 dicer was cloned in a similar manner between the T7 transcriptional promoters using the following sequences for DCL1 and DCL2, respectively:

#### DCL1 - 252bp

TGCGGAAGAAGTGAAGGTTTGCTACACAGTCAAATATGTAAGTGCAGAAGATCCCAGCTTGCTGCAG  
TACTCAATCAAAGGTAAACCTGAGACTCTTGCCTACTATGATCCCTTGGGCCCGAAATTCAATACTCC

TCTTTATCTTCAAATGCTCCCGCTTCTAAAAGACAATCCTATCTTTCGGAAGCCATTTGTATTTGGGAC  
AGAAGCCAGTAGAACTCTAGGATCTTGGTGTGTTGACCAGATCTGGAC

DCL2 -238bp

GGATGCCATTTGCTGCACGCCAAAAATACATCGAGCAGATCTTCGCCTTCGAGTAAAGCTACCACTTC  
TATCTATTATCTACTATACCCAGAGTCAAATATCATCGTGACGAAAAGTGTGGCGAGCCTGAGAAA  
GATTGTGCAAAGTCTCAACATTTTCGAAGACCCCTACGTTTTGACACTAAAAGGAGTGATAGCGAA  
AAAAGTCAACGTGAGCTGGCGAAAGTACTCAAGAGT

## Results

**Table S1.** Coefficient treatment interaction and growth inhibition by dsRNA and fungicides.

| CNT                               |                    |                     | <sup>1</sup> Final growth level (O.D 600nm) |                   |                           |                                                      | <sup>2</sup> Growth inhibition (%) |                   |                           |
|-----------------------------------|--------------------|---------------------|---------------------------------------------|-------------------|---------------------------|------------------------------------------------------|------------------------------------|-------------------|---------------------------|
|                                   | 0                  |                     | 0.32±0.04                                   |                   |                           |                                                      | 0                                  |                   |                           |
|                                   | dsRNA-<br>ERG (ng) | Fungicides<br>(ppb) | dsRNA-<br>ERG Only                          | Fungicide<br>only | dsRNA-ERG<br>+ Fungicides | <sup>3</sup> Coefficient<br>treatment<br>interaction | dsRNA-<br>ERG only                 | Fungicide<br>only | dsRNA-ERG<br>+ Fungicides |
| Prochloraz                        |                    | 0                   | 0.08±0.02                                   |                   |                           |                                                      | 75.41                              |                   |                           |
|                                   | 800                | 1                   |                                             | 0.31±0.02         | 0.07±0.02                 | 0.9                                                  |                                    | 5.82              | 77.89                     |
|                                   |                    | 10                  |                                             | 0.30±0.03         | 0.06±0.01                 | 0.8                                                  |                                    | 6.96              | 82.53                     |
|                                   |                    | 100                 |                                             | 0.25±0.02         | 0.05±0.00                 | 0.8                                                  |                                    | 21.42             | 85.93                     |
|                                   |                    | 1000                |                                             | 0.10±0.00         | 0.04±0.00                 | 1.6                                                  |                                    | 68.07             | 86.24                     |
| Fludioxonil                       |                    | 0                   | 0.08±0.02                                   |                   |                           |                                                      | 75.41                              |                   |                           |
|                                   | 800                | 1                   |                                             | 0.10±0.00         | 0.04±0.00                 | 1.6                                                  |                                    | 68.66             | 89.07                     |
|                                   |                    | 10                  |                                             | 0.10±0.01         | 0.03±0.00                 | 1.2                                                  |                                    | 69.38             | 89.79                     |
|                                   |                    | 100                 |                                             | 0.10±0.00         | 0.04±0.00                 | 1.6                                                  |                                    | 67.99             | 88.25                     |
|                                   |                    | 1000                |                                             | 0.10±0.00         | 0.03±0.00                 | 1.2                                                  |                                    | 67.76             | 89.64                     |
| CNT                               | 0                  |                     | 0.22±0.03                                   |                   |                           |                                                      | 0                                  |                   |                           |
| Fludioxonil low<br>concentrations |                    | 0                   | 0.14±0.01                                   |                   |                           |                                                      | 31.75                              |                   |                           |
|                                   | 800                | 0.01                |                                             | 0.18±0.01         | 0.15±0.01                 | 1.3                                                  |                                    | 16.61             | 28.73                     |
|                                   |                    | 0.1                 |                                             | 0.16±0.02         | 0.14±0.01                 | 1.3                                                  |                                    | 27.80             | 36.96                     |
|                                   |                    |                     |                                             |                   |                           |                                                      |                                    |                   |                           |
|                                   |                    | 1                   |                                             | 0.15±0.03         | 0.13±0.01                 | 1.2                                                  |                                    | 29.66             | 40.84                     |

<sup>1</sup>The final growth level is the final O.D measurement during the kinetics of fungal growth.

<sup>2</sup>Growth inhibition percentage was calculated by  
(O.D in control well – O.D in treatment well)/ O.D in control well X100

<sup>3</sup>Coefficient treatment interaction (CTI) was calculated as follows:  $CTI = AB / (A \times B)$ . AB is the ratio of the treatment combination to control; A or B is the ratio of the single treatment to control.  $CTI < 1$  is considered a synergistic interaction.

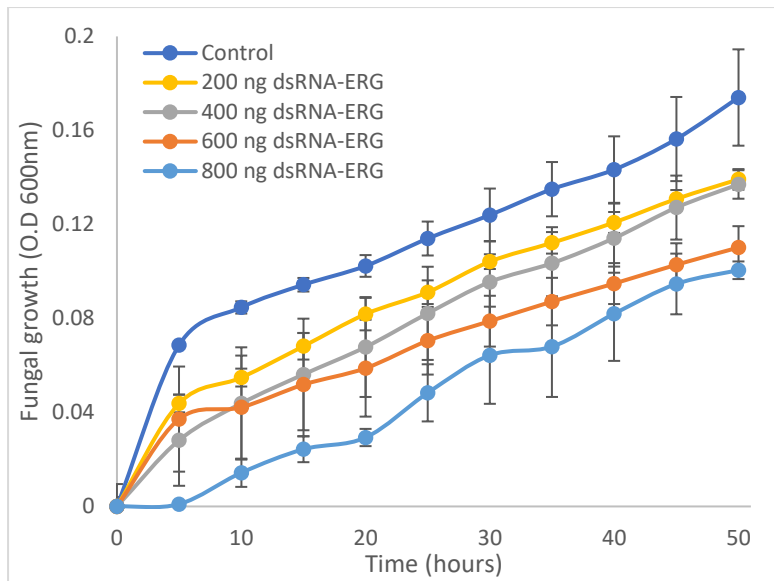

**Figure S1.** Dose effect of dsRNA-ERG on fungal growth. *B. cinerea* conidia were grown at room temperature in 1% MSB, or 1% MSB supplemented with various concentrations of dsRNA-ERG. O.D. measurements at 600 nm were taken every hour. The presented data are mean and standard errors.

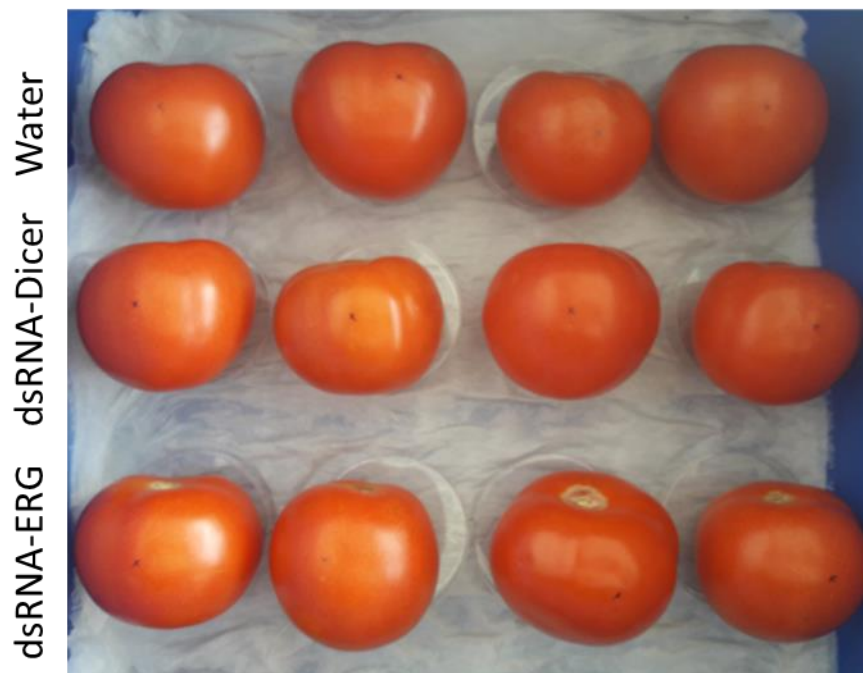

**Figure S2.** No wounding infection. Tomato fruit was treated with water (control), Bc-DCL1/2-dsRNA (dsRNA-Dicer), or Bc-ERG1/13/11-dsRNA (dsRNA-ERG) following inoculation by *B. cinerea*. No decay was observed. Representative pictures were taken three days post-inoculation.

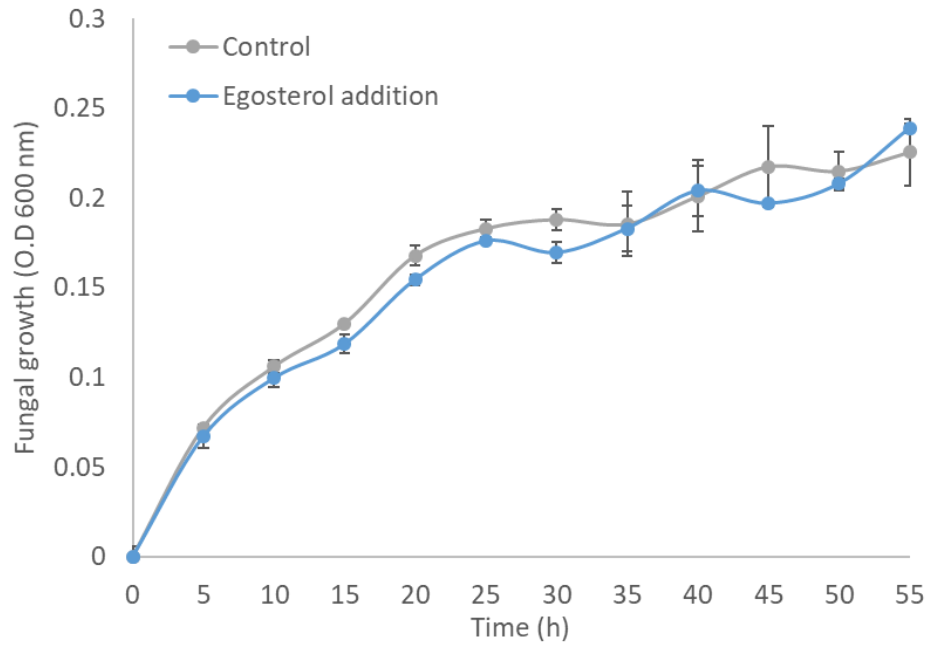

**Figure S3.** Fungal growth with external ergosterol addition. *B. cinerea* conidia were grown at room temperature in 1% MSB, or 1% MSB supplemented with ergosterol. O.D measurements at 600 nm were taken every 5 hours. The presented data are mean and standard errors.

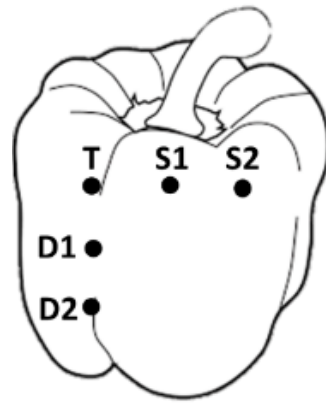

**Figure S4.** Illustration of systemic evaluation experiment set-up. dsRNA-ERG was applied at the top left corner, marked with T, following inoculation of *B. cinerea*. S1, S2, D1, and D2 are *B. cinerea* inoculation points located 1.5 and 3 cm (in tomatoes) or 2 and 4 cm (in bell peppers) distance from the treatment point.



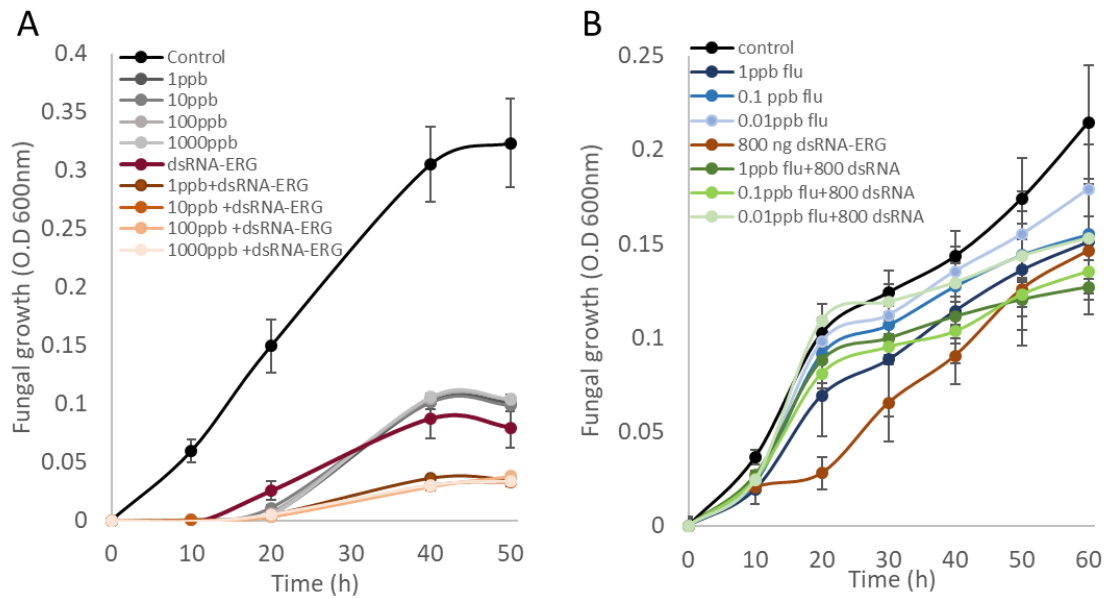

**Figure S5.** dsRNA-ERG application reduces fungicide-needed concentration for growth inhibition of *B. cinerea*. *B. cinerea* conidia were incubated at room temperature in 1% SMB, or 1% SMB supplemented with various concentrations of fludioxonil with or without dsRNA-ERG. O.D measurements at 600 nm were taken every 10 hours. A. Fludioxonil was applied at concentrations of 1-1000 ppb. B. Fludioxonil was applied at lower concentrations (0.01-1 ppb). The presented data are mean and standard errors.
